# Supplementary material
Source: PubMed Central journal article supplement (PMC6283501)

## Supplemental Data

**Supplemental Table S1. Phenotypic and genotypic drug resistance identified in sequenced *M. tuberculosis* strains\***

| ID      | Strain Lineage | Phenotypic resistance detected | Genotypic resistance detected |                   |                   |                    |                  |            |
|---------|----------------|--------------------------------|-------------------------------|-------------------|-------------------|--------------------|------------------|------------|
|         |                |                                | Isoniazid                     | Rifampicin        | Ethambutol        | Pyrazinamide       | Streptomycin     | Quinolones |
| 14-V054 | Beijing        | HSRE                           | <i>katG</i> S315T             | <i>rpoB</i> H445L | <i>embB</i> M306V | ND                 | <i>rpsL</i> K88R | ND         |
| 14-V080 | Beijing        | HSRE                           | <i>katG</i> S315T             | <i>rpoB</i> S450L | <i>embB</i> M306I | <i>pncA</i> S164   | <i>rpsL</i> K88R | ND         |
| 10-V021 | Beijing        | HSRE                           | <i>katG</i> S315T             | <i>rpoB</i> S450L | <i>embB</i> M306V | <i>pncA</i> F58S   | <i>rpsL</i> K43R | ND         |
| 10-V005 | Beijing        | HSRE                           | <i>katG</i> S315T             | <i>rpoB</i> D435V | <i>embB</i> M306V | <i>pncA</i> E181   | <i>rpsL</i> K43R | ND         |
| 14-V042 | Beijing        | HSRE                           | <i>katG</i> S315T             | <i>rpoB</i> S450L | <i>embB</i> Q497R | <i>pncA</i> L151S  | <i>rpsL</i> K43R | ND         |
| 10-V008 | Beijing        | HSRE                           | <i>katG</i> S315T             | <i>rpoB</i> I491F | <i>embB</i> Q497R | <i>pncA</i> L19fs  | <i>rpsL</i> K43R | ND         |
| 14-V051 | Beijing        | HSRE                           | <i>katG</i> S315T             | <i>rpoB</i> S450L | <i>embB</i> F330S | <i>pncA</i> V131fs | <i>rpsL</i> K88R | ND         |
| 14-V036 | Beijing        | HSRE                           | <i>katG</i> S315T             | <i>rpoB</i> H445R | <i>embB</i> M306I | <i>pncA</i> Q10P   | <i>rpsL</i> K43R | ND         |
| 10-V012 | Beijing        | HSR                            | <i>katG</i> S315T             | <i>rpoB</i> S450L | <i>embB</i> Q497R | ND                 | <i>rpsL</i> K88R | ND         |
| 14-V081 | Beijing        | HSR                            | <i>katG</i> S315T             | <i>rpoB</i> S450L | <i>embB</i> Q497R | ND                 | <i>rpsL</i> K88R | ND         |
| 14-V060 | Beijing        | HSR                            | <i>katG</i> S315T             | <i>rpoB</i> S450L | <i>embB</i> M306I | <i>pncA</i> A28T   | <i>rpsL</i> K88R | ND         |
| 14-V083 | Beijing        | HSR                            | <i>katG</i> S315T             | <i>rpoB</i> S450L | <i>embB</i> M306I | <i>pncA</i> A28T   | <i>rpsL</i> K88R | ND         |

|         |         |     |                                         |                   |                   |                  |                  |    |
|---------|---------|-----|-----------------------------------------|-------------------|-------------------|------------------|------------------|----|
| 10-V014 | Beijing | HSR | <i>fabG1</i> C-15T,<br><i>inhA</i> T17I | <i>rpoB</i> S450L | ND                | ND               | <i>rrs</i> A514C | ND |
| 14-V061 | Beijing | HSR | <i>fabG1</i> C-15T,<br><i>inhA</i> S94A | <i>rpoB</i> H445Y | <i>embB</i> G406S | ND               | <i>rpsL</i> K43R | ND |
| 10-V004 | Beijing | HS  | <i>katG</i> S315T                       | ND                | ND                | ND               | <i>rpsL</i> K88R | ND |
| 14-V052 | Beijing | HS  | <i>katG</i> S315T                       | ND                | ND                | ND               | <i>rpsL</i> K88R | ND |
| 14-V034 | Beijing | HS  | <i>fabG1</i> C-15T                      | ND                | ND                | ND               | <i>rpsL</i> K88R | ND |
| 14-V064 | Beijing | HS  | <i>fabG1</i> C-15T                      | ND                | ND                | ND               | <i>rpsL</i> K88R | ND |
| 10-V027 | Beijing | HS  | <i>katG</i> S315T                       | ND                | ND                | <i>pncA</i> F94L | <i>rpsL</i> K88R | ND |
| 10-V029 | Beijing | HS  | <i>katG</i> S315T                       | ND                | ND                | <i>pncA</i> F94L | <i>rpsL</i> K88R | ND |
| 10-V023 | Beijing | HS  | <i>katG</i> S315T                       | ND                | ND                | ND               | <i>rpsL</i> K43R | ND |
| 14-V032 | Beijing | HS  | <i>katG</i> S315T                       | ND                | ND                | ND               | <i>rpsL</i> K43R | ND |
| 14-V070 | Beijing | HS  | <i>katG</i> S315T                       | ND                | ND                | ND               | <i>rpsL</i> K43R | ND |
| 14-V075 | Beijing | HS  | <i>katG</i> S315T                       | ND                | ND                | ND               | <i>rpsL</i> K43R | ND |
| 09-V001 | Beijing | HS  | <i>katG</i> S315T                       | <i>rpoB</i> I491F | <i>embB</i> M306V | ND               | <i>rpsL</i> K43R | ND |
| 14-V062 | Beijing | HS  | <i>katG</i> S315T                       | ND                | ND                | ND               | <i>rpsL</i> K43R | ND |
| 14-V073 | Beijing | HS  | <i>katG</i> S315T                       | ND                | ND                | ND               | <i>rpsL</i> K43R | ND |

|         |         |    |                          |                   |                   |                  |                         |                  |
|---------|---------|----|--------------------------|-------------------|-------------------|------------------|-------------------------|------------------|
| 14-V076 | Beijing | HS | <i>katG</i> S315T<br>36% | ND                | ND                | ND               | <i>rpsL</i> K88R<br>34% | ND               |
| 14-V058 | Beijing | HS | <i>katG</i> S315T        | ND                | ND                | <i>pncA</i> S164 | <i>rpsL</i> K43R        | ND               |
| 14-V037 | Beijing | HS | <i>katG</i> S315T        | ND                | ND                | ND               | <i>rpsL</i> K88R        | ND               |
| 14-V050 | Beijing | SR | <i>fabG1</i> C-15T       | <i>rpoB</i> S450L | <i>embB</i> D354A | ND               | <i>rpsL</i> K43R        | ND               |
| 14-V039 | Beijing | S  | <i>fabG1</i> C-15T       | ND                | ND                | ND               | <i>rpsL</i> K88R        | ND               |
| 14-V082 | Beijing | S  | <i>fabG1</i> C-15T       | ND                | ND                | ND               | <i>rpsL</i> K88R        | ND               |
| 14-V045 | Beijing | S  | ND                       | ND                | ND                | ND               | <i>rpsL</i> K43R        | ND               |
| 14-V057 | Beijing | S  | ND                       | ND                | ND                | ND               | <i>rpsL</i> K43R        | ND               |
| 14-V041 | Beijing | S  | ND                       | ND                | ND                | ND               | <i>rpsL</i> K43R        | ND               |
| 14-V068 | Beijing | S  | ND                       | ND                | ND                | ND               | <i>rpsL</i> K43R        | ND               |
| 14-V031 | Beijing | S  | ND                       | ND                | ND                | ND               | <i>rpsL</i> A205R       | ND               |
| 14-V078 | Beijing | S  | ND                       | ND                | ND                | ND               | <i>rpsL</i> K88R        | <i>gyrA</i> A90V |
| 14-V030 | Beijing | S  | ND                       | ND                | ND                | ND               | <i>rpsL</i> K88R        | ND               |
| 14-V074 | Beijing | S  | ND                       | ND                | ND                | ND               | <i>rpsL</i> K43R        | ND               |
| 10-V019 | Beijing | S  | ND                       | ND                | ND                | ND               | <i>rrs</i> A514C        | ND               |
| 14-V072 | Beijing | S  | ND                       | ND                | ND                | ND               | <i>rrs</i> A514C        | ND               |
| 10-     | Beijing | S  | ND                       | ND                | ND                | ND               | <i>rrs</i> A514C        | ND               |

|         |              |      |                                         |                   |                   |                  |                                         |    |
|---------|--------------|------|-----------------------------------------|-------------------|-------------------|------------------|-----------------------------------------|----|
| V011    |              |      |                                         |                   |                   |                  |                                         |    |
| 10-V020 | Beijing      | S    | ND                                      | ND                | ND                | ND               | <i>rpsL</i> K43R                        | ND |
| 09-V003 | Beijing      | S    | ND                                      | ND                | ND                | ND               | <i>rpsL</i> K43R                        | ND |
| 14-V033 | Beijing      | S    | ND                                      | ND                | ND                | ND               | <i>rrs</i> A514C                        | ND |
| 14-V046 | Beijing      | S    | ND                                      | ND                | ND                | ND               | <i>rrs</i> A517C                        | ND |
| 14-V066 | Beijing      | S    | ND                                      | ND                | ND                | ND               | ND                                      | ND |
| 14-V084 | Beijing      | S    | ND                                      | ND                | ND                | ND               | ND                                      | ND |
| 14-V067 | Indo-Oceanic | HSRE | <i>fabG1</i> C-15T,<br><i>inhA</i> S94A | <i>rpoB</i> H445Y | <i>embB</i> G406S | ND               | <i>rpsL</i> K43R                        | ND |
| 10-V024 | Indo-Oceanic | HSRE | <i>katG</i> S315T                       | <i>rpoB</i> S450L | <i>embB</i> E405D | ND               | <i>gidB</i> F12fs                       | ND |
| 10-V018 | Indo-Oceanic | HSR  | <i>katG</i> S315T                       | <i>rpoB</i> S450L | ND                | <i>pncA</i> Met1 | <i>rpsL</i> K43R                        | ND |
| 14-V035 | Indo-Oceanic | HS   | <i>fabG1</i> C-15T                      | ND                | <i>embB</i> A439T | <i>pncA</i> V9A  | <i>gidB</i> L79S,<br><i>gidB</i> A119T  | ND |
| 14-V038 | Indo-Oceanic | HS   | <i>fabG1</i> C-15T                      | ND                | <i>embB</i> A439T | <i>pncA</i> V9A  | <i>gidB</i> L79S,<br><i>gidB</i> A119T  | ND |
| 10-V010 | Indo-Oceanic | HS   | <i>katG</i> S315T                       | <i>rpoB</i> D435Y | ND                | ND               | <i>rpsL</i> K88R                        | ND |
| 10-V025 | Indo-Oceanic | HS   | <i>katG</i> S315T                       | ND                | ND                | ND               | <i>rpsL</i> K88R,<br><i>gidB</i> A118fs | ND |
| 10-V028 | Indo-Oceanic | HS   | <i>katG</i> S315T                       | ND                | ND                | ND               | <i>rpsL</i> K88R,<br><i>gidB</i> A118fs | ND |
| 14-V063 | Indo-Oceanic | HS   | <i>furA</i> L68F                        | ND                | ND                | ND               | ND                                      | ND |

|         |               |    |                         |    |    |                     |                  |                  |
|---------|---------------|----|-------------------------|----|----|---------------------|------------------|------------------|
| 10-V007 | Indo-Oceanic  | HS | <i>katG</i> S315T       | ND | ND | ND                  | ND               | ND               |
| 14-V059 | Indo-Oceanic  | HS | <i>katG</i> S315T       | ND | ND | <i>pncA</i> A134Y   | <i>rpsL</i> K43R | ND               |
| 14-V044 | Indo-Oceanic  | H  | <i>fabG1</i> C-15T      | ND | ND | <i>pncA</i> -13 C>A | ND               | ND               |
| 14-V056 | Indo-Oceanic  | H  | <i>fabG1</i> C-15T      | ND | ND | <i>pncA</i> -13 C>A | ND               | ND               |
| 10-V026 | Indo-Oceanic  | H  | <i>furA</i> L68F        | ND | ND | ND                  | ND               | ND               |
| 10-V006 | Indo-Oceanic  | S  | ND                      | ND | ND | <i>pncA</i> E174K   | <i>rrs</i> A514C | ND               |
| 14-V049 | Indo-Oceanic  | S  | ND                      | ND | ND | <i>pncA</i> E174K   | <i>rrs</i> A514C | ND               |
| 10-V002 | Indo-Oceanic  | S  | ND                      | ND | ND | ND                  | <i>rrs</i> A514C | ND               |
| 10-V013 | Indo-Oceanic  | S  | ND                      | ND | ND | ND                  | <i>gidB</i> W45  | ND               |
| 10-V015 | Indo-Oceanic  | S  | <i>katG</i> P131Q       | ND | ND | ND                  | <i>rpsL</i> K43R | ND               |
| 10-V016 | Indo-Oceanic  | S  | ND                      | ND | ND | ND                  | <i>rrs</i> A514C | ND               |
| 10-V017 | Indo-Oceanic  | S  | ND                      | ND | ND | ND                  | <i>rrs</i> A514C | ND               |
| 14-V069 | Indo-Oceanic  | S  | ND                      | ND | ND | ND                  | <i>rpsL</i> K88R | ND               |
| 14-V079 | Indo-Oceanic  | S  | ND                      | ND | ND | ND                  | <i>rpsL</i> K88R | <i>gyrA</i> A90V |
| 14-V040 | Euro-American | HS | <i>katG</i> S315T (42%) | ND | ND | ND                  | <i>rpsL</i> K88R | ND               |
| 14-V043 | Euro-American | HS | <i>katG</i> S315T (36%) | ND | ND | ND                  | <i>rpsL</i> K88R | ND               |
| 14-     | Euro-         | HS | <i>katG</i> S315T       | ND | ND | ND                  | ND               | ND               |

|         |               |             |                   |    |    |    |                   |                  |
|---------|---------------|-------------|-------------------|----|----|----|-------------------|------------------|
| V047    | American      |             |                   |    |    |    |                   |                  |
| 14-V048 | Euro-American | HS          | <i>katG</i> S315T | ND | ND | ND | <i>gidB</i> R47P  | ND               |
| 14-V077 | Euro-American | H           | <i>katG</i> S315T | ND | ND | ND | ND                | ND               |
| 10-V022 | Euro-American | S           | ND                | ND | ND | ND | <i>gidB</i> fs    | ND               |
| 14-V053 | Euro-American | S           | ND                | ND | ND | ND | <i>gidB</i> W45   | ND               |
| 14-V055 | Euro-American | S           | ND                | ND | ND | ND | <i>gidB</i> Trp45 | ND               |
| 14-V071 | Euro-American | S           | ND                | ND | ND | ND | <i>gidB</i> V66fs | ND               |
| 10-V009 | Other         | S           | ND                | ND | ND | ND | <i>rrs</i> 517C>T | ND               |
| 14-V065 | Other         | S           | ND                | ND | ND | ND | <i>gidB</i> L91R  | ND               |
| 14-V194 | Beijing       | Susceptible | ND                | ND | ND | ND | ND                | <i>gyrA</i> D94G |
| 09-V085 | Beijing       | Susceptible | ND                | ND | ND | ND | ND                | ND               |
| 09-V088 | Beijing       | Susceptible | ND                | ND | ND | ND | ND                | ND               |
| 14-V189 | Beijing       | Susceptible | ND                | ND | ND | ND | ND                | ND               |
| 14-V131 | Beijing       | Susceptible | ND                | ND | ND | ND | ND                | ND               |
| 14-V145 | Beijing       | Susceptible | ND                | ND | ND | ND | ND                | ND               |
| 14-V146 | Beijing       | Susceptible | ND                | ND | ND | ND | ND                | ND               |

|         |               |             |    |    |    |    |                    |    |
|---------|---------------|-------------|----|----|----|----|--------------------|----|
| 14-V178 | Beijing       | Susceptible | ND | ND | ND | ND | ND                 | ND |
| 10-V113 | Beijing       | Susceptible | ND | ND | ND | ND | ND                 | ND |
| 14-V118 | Beijing       | Susceptible | ND | ND | ND | ND | ND                 | ND |
| 14-V167 | Beijing       | Susceptible | ND | ND | ND | ND | ND                 | ND |
| 14-V177 | Beijing       | Susceptible | ND | ND | ND | ND | ND                 | ND |
| 14-V187 | Beijing       | Susceptible | ND | ND | ND | ND | ND                 | ND |
| 14-V134 | Indo-Oceanic  | Susceptible | ND | ND | ND | ND | <i>gidB</i> A118fs | ND |
| 14-V128 | Indo-Oceanic  | Susceptible | ND | ND | ND | ND | ND                 | ND |
| 14-V154 | Indo-Oceanic  | Susceptible | ND | ND | ND | ND | ND                 | ND |
| 10-V109 | Euro-American | Susceptible | ND | ND | ND | ND | ND                 | ND |
| 14-V120 | Euro-American | Susceptible | ND | ND | ND | ND | ND                 | ND |

NA – not applicable; H – isoniazid; R – rifampicin; E – ethambutol; S – streptomycin; ND – no relevant mutation detected

\*Sequenced *M. tuberculosis* strains included all strains with phenotypic resistance to any first-line drug (84) and those that clustered by MIRU-24 (an additional 18 drug susceptible strains)

**Supplemental Table S2. Comparison of *M. tuberculosis* cluster characteristics among TB/HIV co-infected patients and community strains\* from Ho Chi Minh City, Vietnam**

| Cluster*<br>number | HIV | Holt**<br>cluster | Terminal<br>branch<br>length | Lineage | Mutations detected |                   |                   |                  |                  |    |
|--------------------|-----|-------------------|------------------------------|---------|--------------------|-------------------|-------------------|------------------|------------------|----|
|                    |     |                   |                              |         | H                  | R                 | E                 | Z                | S                | Q  |
| 1                  | +   | NA                | 5                            | Beijing | <i>katG</i> S315T  | <i>rpoB</i> S450L | <i>embB</i> M306I | <i>pncA</i> S164 | <i>rpsL</i> K88R | ND |
|                    | -   | 103               | 2                            | Beijing | <i>katG</i> S315T  | ND                | ND                | <i>pncA</i> S164 | <i>rpsL</i> K43R | ND |
|                    | -   | 103               | 1                            | Beijing | <i>katG</i> S315T  | ND                | ND                | <i>pncA</i> S164 | <i>rpsL</i> K43R | ND |
| 2                  | +   | NA                | 0                            | Beijing | ND                 | ND                | ND                | ND               | ND               | ND |
|                    | -   | NA                | 1                            | Beijing | ND                 | ND                | ND                | ND               | ND               | ND |
| 3                  | +   | NA                | 1                            | Beijing | ND                 | ND                | ND                | ND               | ND               | ND |
|                    | -   | 91                | 6                            | Beijing | ND                 | ND                | ND                | ND               | ND               | ND |
| 4                  | +   | NA                | 5                            | Beijing | ND                 | ND                | ND                | ND               | <i>rpsL</i> K43R | ND |
|                    | +   | NA                | 6                            | Beijing | ND                 | ND                | ND                | ND               | <i>rpsL</i> K43R | ND |
|                    | -   | 1                 | 1                            | Beijing | ND                 | ND                | ND                | ND               | <i>rpsL</i> K43R | ND |
|                    | -   | 1                 | 4                            | Beijing | ND                 | ND                | ND                | ND               | <i>rpsL</i> K43R | ND |
|                    | -   | 1                 | 0                            | Beijing | ND                 | ND                | ND                | ND               | <i>rpsL</i> K43R | ND |



|   |   |     |   |                                |    |    |    |    |                      |    |
|---|---|-----|---|--------------------------------|----|----|----|----|----------------------|----|
| 5 | + | NA  | 1 | Beijing                        | ND | ND | ND | ND | <i>rpsL</i><br>K43R  | ND |
|   | - | NA  | 1 | Beijing                        | ND | ND | ND | ND | <i>rpsL</i><br>K43R  | ND |
| 6 | + | NA  | 1 | Beijing                        | ND | ND | ND | ND | <i>rpsL</i><br>K43R  | ND |
|   | - | 71  | 8 | Beijing                        | ND | ND | ND | ND | <i>rpsL</i><br>K43R  | ND |
|   | - | 71  | 8 | Beijing                        | ND | ND | ND | ND | <i>rpsL</i><br>K43R  | ND |
|   | - | 71  | 7 | Beijing                        | ND | ND | ND | ND | <i>rpsL</i><br>K43R  | ND |
| 7 | + | NA  | 3 | Beijing                        | ND | ND | ND | ND | AlaArg205            | ND |
|   | - | NA  | 3 | Beijing                        | ND | ND | ND | ND | AlaArg205            | ND |
| 8 | + | NA  | 5 | Euro-<br>American <sup>#</sup> | ND | ND | ND | ND | <i>rrs</i><br>517C>T | ND |
|   | - | 177 | 7 | Euro-<br>American <sup>#</sup> | ND | ND | ND | ND | <i>rrs</i><br>517C>T | ND |
|   | - | 177 | 6 | Euro-<br>American <sup>#</sup> | ND | ND | ND | ND | <i>rrs</i><br>517C>T | ND |
|   | - | 177 | 7 | Euro-<br>American <sup>#</sup> | ND | ND | ND | ND | <i>rrs</i><br>517C>T | ND |
|   | - | 177 | 2 | Euro-<br>American <sup>#</sup> | ND | ND | ND | ND | <i>rrs</i><br>C517T  | ND |
| 9 | + | NA  | 4 | Euro-<br>American <sup>#</sup> | ND | ND | ND | ND | L91A                 | ND |

|    |   |     |   |                            |                  |    |    |    |                  |           |
|----|---|-----|---|----------------------------|------------------|----|----|----|------------------|-----------|
|    | - | 172 | 4 | Euro-American <sup>#</sup> | ND               | ND | ND | ND | ND               | ND        |
|    | - | 172 | 3 | Euro-American <sup>#</sup> | ND               | ND | ND | ND | ND               | ND        |
|    | - | 172 | 3 | Euro-American <sup>#</sup> | ND               | ND | ND | ND | ND               | ND        |
|    | - | 172 | 5 | Euro-American <sup>#</sup> | ND               | ND | ND | ND | ND               | gyrA S91P |
|    | - | 172 | 6 | Euro-American <sup>#</sup> | ND               | ND | ND | ND | ND               | ND        |
| 10 | + | NA  | 0 | Indo-Oceanic               | ND               | ND | ND | ND | <i>gidB</i> fs   | ND        |
|    | - | NA  | 1 | Indo-Oceanic               | ND               | ND | ND | ND | <i>gidB</i> fs   | ND        |
| 11 | + | NA  | 4 | Indo-Oceanic               | ND               | ND | ND | ND | <i>gidB</i> W45  | ND        |
|    | + | NA  | 1 | Indo-Oceanic               | ND               | ND | ND | ND | <i>gidB</i> W45  | ND        |
|    | - | 210 | 5 | Indo-Oceanic               | ND               | ND | ND | ND | <i>gidB</i> W45  | ND        |
|    | - | 210 | 7 | Indo-Oceanic               | ND               | ND | ND | ND | <i>gidB</i> W45  | ND        |
| 12 | + | NA  | 1 | Indo-Oceanic               | <i>furA</i> L68F | ND | ND | ND | ND               | ND        |
|    | - | NA  | 4 | Indo-Oceanic               | <i>furA</i> L68F | ND | ND | ND | ND               | ND        |
| 13 | - | NA  | 5 | Beijing                    | ND               | ND | ND | ND | ND               | ND        |
|    | - | NA  | 1 | Beijing                    | ND               | ND | ND | ND | ND               | ND        |
|    | + | NA  | 7 | Beijing                    | ND               | ND | ND | ND | <i>rpsL</i> K88R | gyrA A90V |
|    | - | ND  | 4 | Beijing                    | ND               | ND | ND | ND | ND               | ND        |

|    |   |     |    |         |                   |    |    |    |                     |    |
|----|---|-----|----|---------|-------------------|----|----|----|---------------------|----|
|    | - | ND  | 2  | Beijing | ND                | ND | ND | ND | ND                  | ND |
|    | + | ND  | 11 | Beijing | ND                | ND | ND | ND | ND                  | ND |
|    | - | 154 | 1  | Beijing | ND                | ND | ND | ND | ND                  | ND |
|    | - | 154 | 3  | Beijing | ND                | ND | ND | ND | ND                  | ND |
|    | - | 154 | 3  | Beijing | ND                | ND | ND | ND | ND                  | ND |
|    | - | 154 | 9  | Beijing | ND                | ND | ND | ND | ND                  | ND |
|    | - | 154 | 6  | Beijing | ND                | ND | ND | ND | ND                  | ND |
|    | - | 154 | 4  | Beijing | ND                | ND | ND | ND | ND                  | ND |
|    | - | 154 | 3  | Beijing | <i>katG</i> S315T | ND | ND | ND | ND                  | ND |
|    | - | 154 | 6  | Beijing | <i>katG</i> S315T | ND | ND | ND | ND                  | ND |
|    | - | 154 | 9  | Beijing | ND                | ND | ND | ND | ND                  | ND |
|    | - | 154 | 0  | Beijing | ND                | ND | ND | ND | ND                  | ND |
|    | - | 154 | 0  | Beijing | ND                | ND | ND | ND | ND                  | ND |
| 14 | + | NA  | 2  | Beijing | ND                | ND | ND | ND | <i>rpsL</i><br>K88R | ND |
|    | - | 62  | 4  | Beijing | ND                | ND | ND | ND | <i>rpsL</i><br>K43R | ND |
|    | - | 62  | 6  | Beijing | ND                | ND | ND | ND | <i>rpsL</i><br>K43R | ND |
|    | + | NA  | 5  | Beijing | ND                | ND | ND | ND | <i>rpsL</i><br>K43R | ND |
| 15 | + | NA  | 1  | Beijing | ND                | ND | ND | ND | <i>rrs</i><br>A514C | ND |
|    | - | 48  | 7  | Beijing | ND                | ND | ND | ND | <i>rrs</i><br>A514C | ND |

|    |   |    |   |         |                   |                      |                      |                  |                     |                                             |
|----|---|----|---|---------|-------------------|----------------------|----------------------|------------------|---------------------|---------------------------------------------|
|    | - | 48 | 0 | Beijing | ND                | ND                   | ND                   | ND               | <i>rrs</i><br>A514C | ND                                          |
|    | - | 48 | 3 | Beijing | ND                | ND                   | ND                   | ND               | <i>rrs</i><br>A514C | ND                                          |
|    | - | 48 | 1 | Beijing | ND                | ND                   | ND                   | ND               | <i>rrs</i><br>A514C | <i>gyrA</i><br>S91P,<br><i>gyrA</i><br>A90V |
| 16 | + | NA | 3 | Beijing | ND                | ND                   | ND                   | ND               | <i>rrs</i><br>A514C | ND                                          |
|    | - | 48 | 3 | Beijing | ND                | ND                   | ND                   | ND               | <i>rrs</i><br>A514C | ND                                          |
|    | - | 48 | 3 | Beijing | ND                | ND                   | ND                   | ND               | <i>rrs</i><br>A514C | ND                                          |
| 17 | + | NA | 4 | Beijing | <i>katG</i> S315T | <i>rpoB</i><br>S450L | <i>embB</i><br>M306V | <i>pncA</i> F58S | <i>rpsL</i><br>K43R | ND                                          |
|    | - | 54 | 5 | Beijing | <i>katG</i> S315T | <i>rpoB</i><br>S450L | <i>embB</i><br>M306V | <i>pncA</i> F58S | <i>rpsL</i><br>K43R | ND                                          |
|    | - | 54 | 2 | Beijing | <i>katG</i> S315T | <i>rpoB</i><br>S450L | <i>embB</i><br>M306V | <i>pncA</i> F58S | <i>rpsL</i><br>K43R | ND                                          |
|    | - | 54 | 8 | Beijing | <i>katG</i> S315T | <i>rpoB</i><br>S450V | <i>embB</i><br>M306V | <i>pncA</i> F58S | <i>rpsL</i><br>K43R | ND                                          |
| 18 | + | NA | 4 | Beijing | <i>katG</i> S315T | ND                   | ND                   | ND               | <i>rpsL</i><br>K43R | ND                                          |

|                    |   |     |    |               |                                      |                   |                   |    |                  |    |
|--------------------|---|-----|----|---------------|--------------------------------------|-------------------|-------------------|----|------------------|----|
|                    | - | NA  | 3  | Beijing       | <i>katG</i> S315T                    | ND                | ND                | ND | <i>rpsL</i> K43R | ND |
| 19                 | + | NA  | 5  | Beijing       | <i>fabG1</i> C-15T, <i>inhA</i> T17I | <i>rpoB</i> S450L | ND                | ND | <i>rrs</i> A514C | ND |
|                    | - | 139 | 3  | Beijing       | <i>fabG1</i> C-15T                   | ND                | ND                | ND | <i>rrs</i> A514C | ND |
|                    | - | 139 | 7  | Beijing       | <i>fabG1</i> C-15T                   | ND                | ND                | ND | <i>rrs</i> A514C | ND |
|                    | - | 139 | 9  | Beijing       | <i>fabG1</i> C-15T                   | ND                | ND                | ND | <i>rrs</i> A514C | ND |
| 20                 | + | NA  | 5  | Indo-Oceanic  | <i>fabG1</i> C-15T, <i>inhA</i> S94A | <i>rpoB</i> H445Y | <i>embB</i> G406D | ND | <i>rpsL</i> K43R | ND |
|                    | - | NA  | 3  | Indo-Oceanic  | <i>fabG1</i> C-15T                   | ND                | ND                | ND | <i>rpsL</i> K43R | ND |
| 21                 | + | NA  | 5  | Beijing       | ND                                   | ND                | ND                | ND | <i>rpsL</i> K88R | ND |
|                    | - | NA  | 4  | Beijing       | ND                                   | ND                | ND                | ND | <i>rpsL</i> K88R | ND |
| Possible cluster 1 | + | NA  | 7  | Beijing       | ND                                   | ND                | ND                | ND | ND               | ND |
|                    | - | NA  | 7  | NA            | ND                                   | ND                | ND                | ND | ND               | ND |
|                    | - | NA  | 12 | NA            | ND                                   | ND                | ND                | ND | ND               | ND |
| Possible cluster 2 | + | NA  | 8  | Euro-American | <i>katG</i> S315T                    | ND                | ND                | ND | ND               | ND |
|                    | - | NA  | 5  | NA            | <i>katG</i> S315T                    | ND                | ND                | ND | ND               | ND |

|                    |   |     |    |               |                   |                    |                   |                   |                  |    |
|--------------------|---|-----|----|---------------|-------------------|--------------------|-------------------|-------------------|------------------|----|
|                    | + | NA  | 10 | Euro-American | <i>katG</i> S315T | ND                 | ND                | ND                | ND               | ND |
| Possible cluster 3 | + | NA  | 11 | Beijing       | <i>katG</i> S315T | <i>rpoB</i> D435V  | <i>embB</i> M306V | <i>pncA</i> E181  | <i>rpsL</i> K43R | ND |
|                    | - | NA  | 7  | NA            | <i>katG</i> S315T | <i>rpoB</i> - 6T>C | ND                | ND                | <i>rpsL</i> K43R | ND |
|                    | + | NA  | 4  | Beijing       | <i>katG</i> S315T | <i>rpoB</i> S450L  | <i>embB</i> Q497R | <i>pncA</i> L151S | <i>rpsL</i> K43R | ND |
| Possible cluster 4 | + | NA  | 11 | Beijing       | <i>katG</i> S315T | ND                 | ND                | ND                | <i>rpsL</i> K43R | ND |
|                    | - | 121 | 6  | NA            | <i>katG</i> S315T | <i>rpoB</i> S450L  | ND                | ND                | <i>rpsL</i> K88R | ND |
| Possible cluster 5 | + | NA  | NA | Beijing       | ND                | ND                 | ND                | ND                | ND               | ND |
|                    | - | 121 | 11 | NA            | <i>katG</i> S315T | <i>rpoB</i> L430P  | <i>embB</i> G406D | ND                | <i>rpsL</i> K88R | ND |
| Possible cluster 6 | + | NA  | 11 | Beijing       | <i>katG</i> S315T | ND                 | ND                | <i>pncA</i> S164  | <i>rpsL</i> K43R | ND |
|                    | - | 103 | 5  | NA            | <i>katG</i> S315T | ND                 | <i>embB</i> M306V | ND                | <i>rpsL</i> K43R | ND |
|                    | - | 103 | 6  | NA            | <i>katG</i> S315T | ND                 | ND                | ND                | <i>rpsL</i> K43R | ND |
|                    | - | 103 | 1  | NA            | <i>katG</i> S315T | ND                 | ND                | ND                | <i>rpsL</i> K43R | ND |
|                    | - | 103 | 0  | NA            | <i>katG</i> S315T | ND                 | ND                | ND                | <i>rpsL</i> K43R | ND |
|                    | - | 103 | 5  | NA            | <i>katG</i> S315T | ND                 | ND                | ND                | <i>rpsL</i> K43R | ND |

|                    |   |    |    |              |                    |                   |                   |                  |                  |    |
|--------------------|---|----|----|--------------|--------------------|-------------------|-------------------|------------------|------------------|----|
| Possible cluster 7 | + | NA | 18 | Indo-Oceanic | <i>katG</i> S315T  | <i>rpoB</i> S450L | ND                | <i>pncA</i> Met1 | <i>rpsL</i> K43R | ND |
|                    | - | NA | 5  | NA           | ND                 | ND                | ND                | ND               | ND               | ND |
|                    | - | NA | NA | NA           | ND                 | ND                | ND                | ND               | ND               | ND |
|                    | - | NA | NA | NA           | ND                 | ND                | ND                | ND               | ND               | ND |
|                    | - | NA | NA | NA           | ND                 | ND                | ND                | ND               | ND               | ND |
| Possible cluster 8 | + | NA | 8  | Beijing      | <i>katG</i> S315T  | <i>rpoB</i> H445R | <i>embB</i> M306I | <i>pncA</i> Q10P | <i>rpsL</i> K43R | ND |
|                    | - | NA | 10 | NA           | <i>katG</i> S315T  | ND                | ND                | ND               | <i>rpsL</i> K43R | ND |
| Possible cluster 9 | + | NA | 10 | Beijing      | <i>katG</i> S315T  | ND                | ND                | ND               | <i>rpsL</i> K88R | ND |
|                    | - | 73 | 15 | NA           | <i>fabG1</i> C-15T | <i>rpoB</i> S450L | ND                | ND               | <i>rpsL</i> K88R | ND |
|                    | - | 73 | 8  | NA           | <i>katG</i> S315T  | <i>rpoB</i> S450W | ND                | ND               | <i>rpsL</i> K88R | ND |
|                    | - | 73 | 12 | NA           | <i>katG</i> S315T  | ND                | ND                | ND               | <i>rpsL</i> K88R | ND |
|                    | - | NA | NA | NA           | ND                 | ND                | ND                | ND               | ND               | ND |

TB – tuberculosis; HIV – human immunodeficiency virus; NA – not available in Holt et.al (1) data; ND – no relevant mutation detected; - negative; + positive; INH – isoniazid; RMP – rifampicin; *EMB* – ethambutol; STR – streptomycin; FQ – Quinolones;

\* WGS cluster identified as  $\leq 10$  SNPs difference, “possible cluster” as 10-20 SNPs difference

\*\* Cluster and sequence data for community *M. tuberculosis* strains were derived from Holt et.al (2).

# Euro-American lineage – sub-lineage MANU

(2) Holt KE, McAdam P, Phan VKT, Dang TMH, Nguyen NL, Nguyen HL, et al. Genomic analysis of *Mycobacterium tuberculosis* reveals complex etiology of tuberculosis in Vietnam including frequent introduction and transmission of Beijing lineage and positive selection for EsxW Beijing variant. bioRxiv. 2016.



**Supplemental Table S3. Information of all sequenced isolates**

| No | ID      | Cluster | No of SNP differences | Year of isolation | Lineage       | Phenotypic resistance detected | Genotypic resistance detected |                   |                   |                  |                                         |    |
|----|---------|---------|-----------------------|-------------------|---------------|--------------------------------|-------------------------------|-------------------|-------------------|------------------|-----------------------------------------|----|
|    |         |         |                       |                   |               |                                | H                             | R                 | E                 | Z                | S                                       | Q  |
| 1  | 10-V027 | 1.WGS   | 0                     | 2010              | Beijing       | HS                             | <i>katG</i> S315T             | ND                | ND                | <i>pncA</i> F94L | <i>rpsL</i> K43R                        | ND |
| 2  | 10-V029 |         | 0                     | 2010              | Beijing       | HS                             | <i>katG</i> S315T             | ND                | ND                | <i>pncA</i> F94L | <i>rpsL</i> K43R                        | ND |
| 3  | 10-V109 | 2.WGS   | 1                     | 2010              | Euro-American | Susceptible                    | ND                            | ND                | ND                | ND               | ND                                      | ND |
| 4  | 14-V120 |         | 3                     | 2014              | Euro-American | Susceptible                    | ND                            | ND                | ND                | ND               | ND                                      | ND |
| 5  | 14-V064 | 3.WGS   | 5                     | 2014              | Beijing       | HS                             | <i>fabG1</i> - 15C>T          | ND                | ND                | ND               | <i>rpsL</i> K43R                        | ND |
| 6  | 14-V082 |         | 3                     | 2014              | Beijing       | S                              | <i>fabG1</i> - 15C>T          | ND                | ND                | ND               | <i>rpsL</i> K43R                        | ND |
| 7  | 14-V053 | 4.WGS   | 4                     | 2014              | Euro-American | S                              | ND                            | ND                | ND                | ND               | <i>gidB</i> Trp45                       | ND |
| 8  | 14-V055 |         | 1                     | 2014              | Euro-American | S                              | ND                            | ND                | ND                | ND               | <i>gidB</i> W45                         | ND |
| 9  | 10-V010 | 5.WGS   | 1                     | 2010              | Indo-Oceanic  | HS                             | <i>katG</i> S315T             | <i>rpoB</i> D435Y | ND                | ND               | <i>rpsL</i> K88R                        | ND |
| 10 | 10-V025 |         | 1                     | 2010              | Indo-Oceanic  | HS                             | <i>katG</i> S315T             | ND                | ND                | ND               | <i>gidB</i> L88T,<br><i>gidB</i> R118fs | ND |
| 11 | 10-V028 |         | 1                     | 2010              | Indo-Oceanic  | HS                             | <i>katG</i> S315T             | ND                | ND                | ND               | <i>gidB</i> L88T,<br><i>gidB</i> R118fs | ND |
| 12 | 10-V012 | 6.WGS   | 0                     | 2010              | Beijing       | HSR                            | <i>katG</i> S315T             | <i>rpoB</i> S450L | <i>embB</i> Q497R | ND               | <i>rpsL</i> K88R                        | ND |
| 13 | 14-     |         | 2                     | 2014              | Beijing       | HSR                            | <i>katG</i>                   | <i>rpoB</i>       | <i>embB</i>       | ND               | <i>rpsL</i> K88R                        | ND |

|    |         |        |   |      |               |     |                         |                   |                   |                      |                                        |    |
|----|---------|--------|---|------|---------------|-----|-------------------------|-------------------|-------------------|----------------------|----------------------------------------|----|
|    | V081    |        |   |      |               |     | S315T                   | S450L             | Q497R             |                      |                                        |    |
| 14 | 14-V030 | 7.WGS  | 2 | 2014 | Beijing       | S   | ND                      | ND                | ND                | ND                   | <i>rpsL</i> K43R                       | ND |
| 15 | 14-V074 |        | 5 | 2014 | Beijing       | S   | ND                      | ND                | ND                | ND                   | <i>rpsL</i> K43R                       | ND |
| 16 | 14-V060 | 8.WGS  | 1 | 2014 | Beijing       | HSR | <i>katG</i> S315T       | <i>rpoB</i> S450L | <i>embB</i> M306I | <i>pncA</i> A28T     | <i>rpsL</i> K88R                       | ND |
| 17 | 14-V083 |        | 0 | 2014 | Beijing       | HSR | <i>katG</i> S315T       | <i>rpoB</i> S450L | <i>embB</i> M306I | <i>pncA</i> A28T     | <i>rpsL</i> K88R                       | ND |
| 18 | 14-V034 | 9.WGS  | 3 | 2014 | Beijing       | HS  | <i>fabG1</i> - 15C>T    | ND                | ND                | ND                   | <i>rpsL</i> K43R                       | ND |
| 19 | 14-V039 |        | 4 | 2014 | Beijing       | S   | <i>fabG1</i> - 15C>T    | ND                | ND                | ND                   | <i>rpsL</i> K43R                       | ND |
| 20 | 14-V035 | 10.WGS | 3 | 2014 | Indo-Oceanic  | HS  | <i>fabG1</i> C-15T      | ND                | <i>embB</i> A439T | <i>pncA</i> V9A      | <i>gidB</i> L79S,<br><i>gidB</i> A119T | ND |
| 21 | 14-V038 |        | 4 | 2014 | Indo-Oceanic  | HS  | <i>fabG1</i> - 15C>T    | ND                | <i>embB</i> A439T | <i>pncA</i> V9A      | <i>gidB</i> L79S,<br><i>gidB</i> A119T | ND |
| 22 | 10-V006 | 11.WGS | 1 | 2010 | Indo-Oceanic  | S   | ND                      | ND                | ND                | <i>pncA</i> E174K    | <i>rrs</i> A514C                       | ND |
| 23 | 14-V049 |        | 2 | 2014 | Indo-Oceanic  | S   | ND                      | ND                | ND                | <i>pncA</i> E174K    | <i>rrs</i> A514C                       | ND |
| 24 | 14-V044 | 12.WGS | 2 | 2014 | Indo-Oceanic  | H   | <i>fabG1</i> - 15C>T    | ND                | ND                | <i>pncA</i> - 13 C>A | ND                                     | ND |
| 25 | 14-V056 |        | 3 | 2014 | Indo-Oceanic  | H   | <i>fabG1</i> - 15C>T    | ND                | ND                | <i>pncA</i> - 13 C>A | ND                                     | ND |
| 26 | 14-V040 | 13.WGS | 0 | 2014 | Indo-Oceanic  | HS  | <i>katG</i> S315T (42%) | ND                | ND                | ND                   | <i>rpsL</i> K88R                       | ND |
| 27 | 14-V043 |        | 0 | 2014 | Euro-American | HS  | <i>katG</i> S315T (36%) | ND                | ND                | ND                   | <i>rpsL</i> K88R                       | ND |

|    |         |  |  |      |               |             |                   |                   |                   |                  |                   |                  |                  |                  |
|----|---------|--|--|------|---------------|-------------|-------------------|-------------------|-------------------|------------------|-------------------|------------------|------------------|------------------|
| 28 | 10-V004 |  |  | 2010 | Beijing       | HS          | <i>katG</i> S315T | ND                | ND                | ND               | <i>rpsL</i> K88R  | ND               |                  |                  |
| 29 | 14-V052 |  |  | 2014 | Beijing       | HS          | <i>katG</i> S315T | ND                | ND                | ND               |                   | <i>rpsL</i> K88R | ND               |                  |
| 30 | 14-V054 |  |  | 2014 | Beijing       | HSRE        | <i>katG</i> S315T | <i>rpoB</i> H445L | <i>embB</i> M306V | ND               |                   |                  | <i>rpsL</i> K88R | ND               |
| 31 | 14-V080 |  |  | 2014 | Beijing       | HSRE        | <i>katG</i> S315T | <i>rpoB</i> S450L | <i>embB</i> M306I | <i>pncA</i> S164 |                   |                  |                  | <i>rpsL</i> K88R |
| 32 | 09-V085 |  |  | 2009 | Beijing       | Susceptible | ND                | ND                | ND                | ND               | ND                | ND               |                  |                  |
| 33 | 09-V088 |  |  | 2009 | Beijing       | Susceptible | ND                | ND                | ND                | ND               | ND                | ND               |                  |                  |
| 34 | 14-V045 |  |  | 2014 | Beijing       | S           | ND                | ND                | ND                | ND               | <i>rpsL</i> K43R  | ND               |                  |                  |
| 35 | 14-V057 |  |  | 2014 | Beijing       | S           | ND                | ND                | ND                | ND               | <i>rpsL</i> K43R  | ND               |                  |                  |
| 36 | 14-V041 |  |  | 2014 | Beijing       | S           | ND                | ND                | ND                | ND               | <i>rpsL</i> K43R  | ND               |                  |                  |
| 37 | 14-V068 |  |  | 2014 | Beijing       | S           | ND                | ND                | ND                | ND               | <i>rpsL</i> K43R  | ND               |                  |                  |
| 38 | 14-V031 |  |  | 2014 | Beijing       | S           | ND                | ND                | ND                | ND               | <i>gidB</i> A205R | ND               |                  |                  |
| 39 | 10-V009 |  |  | 2010 | Other         | S           | ND                | ND                | ND                | ND               | <i>rrs</i> C517T  | ND               |                  |                  |
| 40 | 14-V065 |  |  | 2014 | Other         | S           | ND                | ND                | ND                | ND               | <i>gidB</i> L91R  | ND               |                  |                  |
| 41 | 10-V022 |  |  | 2010 | Euro-American | S           | ND                | ND                | ND                | ND               | <i>gidB</i> fs    | ND               |                  |                  |
| 42 | 14-V063 |  |  | 2014 | Indo-Oceanic  | HS          | <i>furA</i> L68F  | ND                | ND                | ND               | ND                | ND               |                  |                  |
| 43 | 10-V019 |  |  | 2010 | Beijing       | S           | ND                | ND                | ND                | ND               | <i>rrs</i> A514C  | ND               |                  |                  |

|    |         |  |  |      |               |             |                                           |                   |                   |                   |                  |                  |
|----|---------|--|--|------|---------------|-------------|-------------------------------------------|-------------------|-------------------|-------------------|------------------|------------------|
| 44 | 14-V072 |  |  | 2014 | Beijing       | S           | ND                                        | ND                | ND                | ND                | <i>rrs</i> A514C | ND               |
| 45 | 10-V021 |  |  | 2010 | Beijing       | HSRE        | <i>katG</i> S315T                         | <i>rpoB</i> S450L | <i>embB</i> M306V | <i>pncA</i> F58S  | <i>rpsL</i> K43R | ND               |
| 46 | 10-V023 |  |  | 2010 | Beijing       | HS          | <i>katG</i> S315T                         | ND                | ND                | ND                | <i>rpsL</i> K43R | ND               |
| 47 | 14-V078 |  |  | 2014 | Beijing       | S           | ND                                        | ND                | ND                | ND                | <i>rpsL</i> K88R | <i>gyrA</i> A90V |
| 48 | 14-V189 |  |  | 2014 | Beijing       | Susceptible | ND                                        | ND                | ND                | ND                | ND               | ND               |
| 49 | 10-V014 |  |  | 2010 | Beijing       | HSR         | <i>fabG1</i> - 15C>T,<br><i>inhA</i> T17I | <i>rpoB</i> S450L | ND                | ND                | <i>rrs</i> A514C | ND               |
| 50 | 14-V131 |  |  | 2014 | Beijing       | Susceptible | ND                                        | ND                | ND                | ND                | ND               | ND               |
| 51 | 10-V007 |  |  | 2010 | Euro-American | HS          | <i>katG</i> S315T                         | ND                | ND                | ND                | ND               | ND               |
| 52 | 14-V077 |  |  | 2014 | Euro-American | H           | <i>katG</i> S315T                         | ND                | ND                | ND                | ND               | ND               |
| 53 | 10-V005 |  |  | 2010 | Beijing       | HSRE        | <i>katG</i> S315T                         | <i>rpoB</i> D435V | <i>embB</i> M306V | <i>pncA</i> E181  | <i>rpsL</i> K43R | ND               |
| 54 | 14-V042 |  |  | 2014 | Beijing       | HSRE        | <i>katG</i> S315T                         | <i>rpoB</i> S450L | <i>embB</i> Q497R | <i>pncA</i> L151S | <i>rpsL</i> K43R | ND               |
| 55 | 14-V032 |  |  | 2014 | Beijing       | HS          | <i>katG</i> S315T                         | ND                | ND                | ND                | <i>rpsL</i> K88R | ND               |
| 56 | 14-V145 |  |  | 2014 | Beijing       | Susceptible | ND                                        | ND                | ND                | ND                | ND               | ND               |
| 57 | 14-V146 |  |  | 2014 | Beijing       | Susceptible | ND                                        | ND                | ND                | ND                | ND               | ND               |
| 58 | 10-V011 |  |  | 2010 | Beijing       | S           | ND                                        | ND                | ND                | ND                | ND               | ND               |
| 59 | 10-V020 |  |  | 2010 | Beijing       | S           | ND                                        | ND                | ND                | ND                | <i>rrs</i> A514C | ND               |

|    |         |  |  |      |               |             |                                          |                   |                   |                   |                  |    |
|----|---------|--|--|------|---------------|-------------|------------------------------------------|-------------------|-------------------|-------------------|------------------|----|
| 60 | 10-V026 |  |  | 2010 | Indo-Oceanic  | H           | <i>furA</i> L68F                         | ND                | ND                | ND                | ND               | ND |
| 61 | 14-V047 |  |  | 2014 | Euro-American | HS          | <i>katG</i> S315T                        | ND                | ND                | ND                | ND               | ND |
| 62 | 14-V059 |  |  | 2014 | Indo-Oceanic  | HS          | <i>katG</i> S315T                        | ND                | ND                | <i>pncA</i> A134Y | <i>rpsL</i> K43R | ND |
| 63 | 14-V061 |  |  | 2014 | Beijing       | HSR         | <i>fabG1</i> -15C>T,<br><i>inhA</i> S94A | <i>rpoB</i> H445Y | <i>embB</i> G406S | ND                | <i>rpsL</i> K43R | ND |
| 64 | 14-V067 |  |  | 2014 | Indo-Oceanic  | HSRE        | <i>fabG1</i> -15C>T,<br><i>inhA</i> S94A | <i>rpoB</i> H445Y | <i>embB</i> G406S | ND                | <i>rpsL</i> K43R | ND |
| 65 | 14-V070 |  |  | 2014 | Beijing       | HS          | <i>katG</i> S315T                        | ND                | ND                | ND                | <i>rpsL</i> K43R | ND |
| 66 | 14-V075 |  |  | 2014 | Beijing       | HS          | <i>katG</i> S315T                        | ND                | ND                | ND                | <i>rpsL</i> K43R | ND |
| 67 | 14-V178 |  |  | 2014 | Beijing       | Susceptible | ND                                       | ND                | ND                | ND                | ND               | ND |
| 68 | 09-V001 |  |  | 2009 | Beijing       | HS          | <i>katG</i> S315T                        | <i>rpoB</i> I491F | <i>embB</i> M306V | ND                | <i>rpsL</i> K43R | ND |
| 69 | 10-V002 |  |  | 2010 | Indo-Oceanic  | S           | ND                                       | ND                | ND                | ND                | <i>rrs</i> A514C | ND |
| 70 | 09-V003 |  |  | 2009 | Beijing       | S           | ND                                       | ND                | ND                | ND                | <i>rpsL</i> K43R | ND |
| 71 | 10-V008 |  |  | 2010 | Beijing       | HSRE        | <i>katG</i> S315T                        | <i>rpoB</i> I491F | <i>embB</i> Q497R | <i>pncA</i> L19fs | <i>rpsL</i> K43R | ND |
| 72 | 10-V013 |  |  | 2010 | Indo-Oceanic  | S           | ND                                       | ND                | ND                | ND                | <i>gidB</i> W45  | ND |
| 73 | 10-V015 |  |  | 2010 | Indo-Oceanic  | S           | <i>katG</i> P131Q                        | ND                | ND                | ND                | <i>rpsL</i> K43R | ND |
| 74 | 10-     |  |  | 2010 | Indo-         | S           | ND                                       | ND                | ND                | ND                | <i>rrs</i> A514C | ND |

|    |         |  |  |      |               |      |                         |                   |                   |                    |                        |                  |
|----|---------|--|--|------|---------------|------|-------------------------|-------------------|-------------------|--------------------|------------------------|------------------|
|    | V016    |  |  |      | Oceanic       |      |                         |                   |                   |                    |                        |                  |
| 75 | 10-V017 |  |  | 2010 | Indo-Oceanic  | S    | ND                      | ND                | ND                | ND                 | <i>rrs</i> A514C       | ND               |
| 76 | 10-V024 |  |  | 2010 | Indo-Oceanic  | HSRE | <i>katG</i> S315T       | <i>rpoB</i> S450L | <i>embB</i> E405D | ND                 | <i>gidB</i> F12fs      | ND               |
| 77 | 14-V033 |  |  | 2014 | Beijing       | S    | ND                      | ND                | ND                | ND                 | <i>rpsL</i> K43R       | ND               |
| 78 | 14-V046 |  |  | 2014 | Beijing       | S    | ND                      | ND                | ND                | ND                 | <i>rrs</i> A514C       | ND               |
| 79 | 14-V048 |  |  | 2014 | Euro-American | HS   | <i>katG</i> S315T       | ND                | ND                | ND                 | <i>gidB</i> R47P       | ND               |
| 80 | 14-V050 |  |  | 2014 | Beijing       | SR   | <i>fabG1</i> -15C>T     | <i>rpoB</i> S450L | <i>embB</i> D354A | ND                 | <i>rpsL</i> K43R       | ND               |
| 81 | 14-V051 |  |  | 2014 | Beijing       | HSRE | <i>katG</i> S315T       | <i>rpoB</i> S450L | <i>embB</i> F330S | <i>pncA</i> V131fs | <i>rpsL</i> K88R       | ND               |
| 82 | 14-V062 |  |  | 2014 | Beijing       | HS   | <i>katG</i> S315T       | ND                | ND                | ND                 | <i>rpsL</i> K43R       | ND               |
| 83 | 14-V066 |  |  | 2014 | Beijing       | S    | ND                      | ND                | ND                | ND                 | <i>rrs</i> A517C       | ND               |
| 84 | 14-V069 |  |  | 2014 | Indo-Oceanic  | S    | ND                      | ND                | ND                | ND                 | <i>rpsL</i> K88R       | ND               |
| 85 | 14-V071 |  |  | 2014 | Euro-American | S    | ND                      | ND                | ND                | ND                 | <i>gidB</i> V66fs      | ND               |
| 86 | 14-V073 |  |  | 2014 | Beijing       | HS   | <i>katG</i> S315T       | ND                | ND                | ND                 | <i>rpsL</i> K43R       | ND               |
| 87 | 14-V076 |  |  | 2014 | Beijing       | HS   | <i>katG</i> S315T (36%) | ND                | ND                | ND                 | <i>rpsL</i> K88R (34%) | ND               |
| 88 | 14-V079 |  |  | 2014 | Indo-Oceanic  | S    | ND                      | ND                | ND                | ND                 | <i>rpsL</i> K88R       | <i>gyrA</i> A90V |
| 89 | 14-V084 |  |  | 2014 | Beijing       | S    | ND                      | ND                | ND                | ND                 | ND                     | ND               |

|     |         |  |  |      |              |             |                      |                      |                      |                     |                                            |                     |
|-----|---------|--|--|------|--------------|-------------|----------------------|----------------------|----------------------|---------------------|--------------------------------------------|---------------------|
| 90  | 10-V113 |  |  | 2010 | Beijing      | Susceptible | ND                   | ND                   | ND                   | ND                  | ND                                         | ND                  |
| 91  | 14-V118 |  |  | 2014 | Beijing      | Susceptible | ND                   | ND                   | ND                   | ND                  | ND                                         | ND                  |
| 92  | 14-V128 |  |  | 2014 | Indo-Oceanic | Susceptible | ND                   | ND                   | ND                   | ND                  | ND                                         | ND                  |
| 93  | 14-V134 |  |  | 2014 | Indo-Oceanic | Susceptible | ND                   | ND                   | ND                   | ND                  | <i>gidB</i><br>R118fs                      | ND                  |
| 94  | 14-V154 |  |  | 2014 | Indo-Oceanic | Susceptible | ND                   | ND                   | ND                   | ND                  | ND                                         | ND                  |
| 95  | 14-V167 |  |  | 2014 | Beijing      | Susceptible | ND                   | ND                   | ND                   | ND                  | ND                                         | ND                  |
| 96  | 14-V177 |  |  | 2014 | Beijing      | Susceptible | ND                   | ND                   | ND                   | ND                  | ND                                         | ND                  |
| 97  | 14-V187 |  |  | 2014 | Beijing      | Susceptible | ND                   | ND                   | ND                   | ND                  | ND                                         | ND                  |
| 98  | 14-V194 |  |  | 2014 | Beijing      | Susceptible | ND                   | ND                   | ND                   | ND                  | ND                                         | <i>gyrA</i><br>D94G |
| 99  | 14-V058 |  |  | 2014 | Beijing      | HS          | <i>katG</i><br>S315T | ND                   | ND                   | <i>pncA</i><br>S164 | <i>rpsL</i> K43R                           | ND                  |
| 100 | 10-V018 |  |  | 2010 | Indo-Oceanic | HSR         | <i>katG</i><br>S315T | <i>rpoB</i><br>S450L | ND                   | <i>pncA</i><br>Met1 | <i>rpsL</i><br>K43R; <i>rrs</i><br>1401A>G | ND                  |
| 101 | 14-V036 |  |  | 2014 | Beijing      | HSRE        | <i>katG</i><br>S315T | <i>rpoB</i><br>H445R | <i>embB</i><br>M306I | <i>pncA</i><br>Q10P | <i>rpsL</i> K43R                           | ND                  |
| 102 | 14-V037 |  |  | 2014 | Beijing      | HS          | <i>katG</i><br>S315T | ND                   | ND                   | ND                  | <i>rpsL</i> K88R                           | ND                  |

ND – no relevant mutation detected; H – isoniazid; R – rifampicin; E – ethambutol; S – streptomycin; F – Quinolones;

**Supplemental Figure S1. Comparison of *M. tuberculosis* branch length in HIV-infected patients by age group**

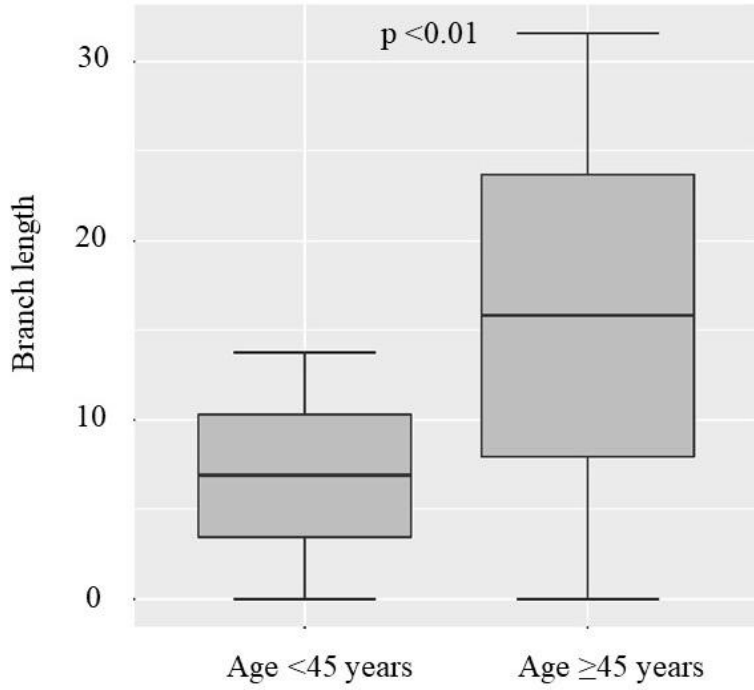

Supplement: tpmd180185.SD1.pdf [file tpmd180185.SD1.pdf]
